# Supplementary material for: Tumour cells down-regulate CCN2 gene expression in co-cultured fibroblasts in a Smad7- and ERK-dependent manner
Source: PubMed Central journal article supplement (PMC3850759; doi:10.1186/1478-811x-11-75), 2013-10-03
Supplement: 1478-811X-11-75-S1.pdf [file 1478-811X-11-75-S1.pdf]

**Supplementary Table 1. Genes included on the Extracellular Matrix and Adhesion Molecules OligoEarray.**

Abbreviations: HAS, hyaluronan synthase; ICAM, intercellular adhesion molecule; NCAM, neural cell adhesion molecule; PECAM, platelet endothelial cell adhesion; VECAM, vascular endothelial cell adhesion molecule; SELE, E-selectin; SELL, L-selectin; SELP, P-selectin; ITGA, integrin  $\alpha$ ; ITGB, integrin  $\beta$ ; MMP, matrix metalloproteinase; SGCE, epsilon-sarcoglycan; SPG7, paraplegin; COL, collagen; CTNN, catenin; ADAMTS, A disintegrin and metalloproteinase with thrombospondin motifs; SPP, stromal processing peptidase; THBS, thrombospondin; CNTN, contactin; VCAN, versican; FN, fibronectin; KAL1, anosmin-1; LAMA, laminin  $\alpha$ ; LAMB, laminin  $\beta$ ; CLEC, Tetranectin; VTN, vitronectin; TIMP, tissue inhibitors of metalloproteinases; ECM, extracellular matrix protein.

|                                                    |                                                                                                                                                                                                                                  |
|----------------------------------------------------|----------------------------------------------------------------------------------------------------------------------------------------------------------------------------------------------------------------------------------|
| <b>Transmembrane Molecules</b>                     | CD44, CDH1, SGCE<br>HAS1,<br>ICAM1, NCAM1, PECAM1, VCAM1,<br>SELE, SELL, SELP<br>ITGA1, ITGA2, ITGA3, ITGA4, ITGA5, ITGA6, ITGA7, ITGA8, ITGAL, ITGAM, ITGAV, ITGB1,<br>ITGB2, ITGB3, ITGB4, ITGB5,<br>MMP14, MMP15, MMP16, SPG7 |
| <b>Cell-Cell Adhesion</b>                          | CD44, CDH1,<br>COL11A1, COL14A1, COL6A2,<br>CTNND1,<br>ICAM1, VCAM1<br>ITGA8                                                                                                                                                     |
| <b>Cell-Matrix Adhesion</b>                        | ADAMTS13,<br>CD44, SGCE<br>ITGA1, ITGA2, ITGA3, ITGA4, ITGA5, ITGA6, ITGA7, ITGA8, ITGAL, ITGAM, ITGAV, ITGB1,<br>ITGB2, ITGB3, ITGB4, ITGB5,<br>SPP1,<br>THBS3.                                                                 |
| <b>Other Adhesion Molecules</b>                    | CNTN1, VCAN, CLEC3B<br>CCN2, THBS1, THBS2, TNC<br>CTNNA1, CTNNB1, CTNND2,                                                                                                                                                        |
| <b>Collagens &amp; ECM Structural Constituents</b> | COL11A1, COL12A1, COL14A1, COL15A1, COL16A1, COL1A1, COL4A2, COL5A1, COL6A1,<br>COL6A2, COL7A1, COL8A1,<br>FN1,<br>KAL1.                                                                                                         |
| <b>ECM Proteases</b>                               | ADAMTS1, ADAMTS13, ADAMTS8,<br>MMP1, MMP10, MMP11, MMP12, MMP13, MMP14, MMP15, MMP16, MMP2, MMP3,<br>MMP7, MMP8, MMP9,<br>SPG7,<br>TIMP1                                                                                         |
| <b>ECM Protease Inhibitors</b>                     | COL7A1,<br>KAL1,<br>THBS1,<br>TIMP1, TIMP2, TIMP3                                                                                                                                                                                |
| <b>Basement Membrane Constituents</b>              | COL4A2, COL7A1,<br>LAMA1, LAMA2, LAMA3, LAMB1, LAMB3, LAMC1,<br>SPARC.                                                                                                                                                           |
| <b>Other ECM Molecules</b>                         | VCAN, CLEC3B<br>CCN2, THBS2, THBS3, TNC<br>ECM1, VTN<br>HAS1, SPP1,<br>TGFB1                                                                                                                                                     |
